# Supplementary material for: The accuracy of postoperative, non-invasive Air-Test to diagnose atelectasis in healthy patients after surgery: a prospective, diagnostic pilot study
Source: PubMed Central journal article supplement — BMJ Open. 2017 May 29;7(5):e015560. doi: 10.1136/bmjopen-2016-015560 (PMC5623366; doi:10.1136/bmjopen-2016-015560), 2017-05-29
Supplement: bmjopen-2016-015560supp001.pdf [file bmjopen-2016-015560supp001.pdf]

## **Supplementary file**

**Title:** The accuracy of postoperative, noninvasive Air-Test to diagnose atelectasis in healthy patients after surgery – a prospective, diagnostic pilot study.

Carlos Ferrando, Carolina Romero, Gerardo Tusman, Fernando Suarez-Sipmann, Jaume Canet, Rosa Dosdá, Paola Valls, Abigail Villena, Ferran Serralta, Ana Jurado, Juan Carrizo, Jose Navarro, Cristina Parrilla, Jose E. Romero, Natividad Pozo, Marina Soro, Jesus Villar, Francisco Javier Belda.

Corresponding Author: Carlos Ferrando

Department of Anesthesiology and Critical Care

Hospital Clínico Universitario

Av. Blasco Ibañez, 17

46010 Valencia. SPAIN

Phone: (+34) 963862600 Fax: (+34) 963862680

Email: [cafeoranestesia@gmail.com](mailto:cafeoranestesia@gmail.com)

## Methods

### Procedures

We performed a pilot study in ten healthy and non-smoker volunteers in the Hospital Privado de Comunidad, Mar de Plata (Argentina) to establish the mean time from Venturi mask removal with oxygen supplementation to the stabilization of the expiratory fraction of Oxygen (FEO<sub>2</sub>) signal. The volunteers were breathing spontaneously through a Venturi mask at 4 L/min with a jet adjusted to a theoretical FiO<sub>2</sub> of 0.5 during 10 min before the Air-Test was performed. Nasal oxygen and carbon dioxide concentrations were measured using a 1 mm ID cannula placed 1 cm inside the right nostril and connected to the side-stream capnograph S5 (GE Healthcare/Datex-Ohmeda, Helsinki, Finland). Time-base oximetry and capnography were recorded with the Datex Collect software (GE Healthcare/Datex-Ohmeda, Helsinki, Finland) and analyzed off-line. We measured mean time needed from mask removal to the stabilization of the FEO<sub>2</sub>.

The FAST SpO<sub>2</sub> algorithm derives SpO<sub>2</sub> using the absorption of red and infrared light. But unlike the traditional algorithm, the FAST algorithm examines the strength of the different frequency components that make up the signals. This approach allows to distinguish the physiological signal from the noise artifacts increasing measurement accuracy<sup>1</sup>. Nevertheless, the SpO<sub>2</sub> measurement was considered qualitatively optimal only when a plethysmography waveform stable and normal was seen during the average time period of 10 seconds given by the monitor. The conventional finger probe pulse oximetry is an accurate reflection of SaO<sub>2</sub> values measured by the reference standard (CO-oximeter) with a bias of 2% and with a standard deviation (precision) of less than 3%<sup>2</sup>.

### Results

Demographic data of the 10 volunteers are described in the were age: 31 (7) years old, weight 71 (9) kg and height: 173 (4) cm. The mean time for the stabilization of the expired O<sub>2</sub> fraction once supplementary oxygen therapy was removed was 56 (7) seconds.

### References

1. Baker SJ, "Motion Resistant" pulse oximetry: A comparison of new and old models. *Anesth Analg* 2002; 95: 967-72.
2. Jubran A. Pulse oximetry. *Crit Care* 2015; 19:272.
